# Supplementary material
Source: Springer Nature journal article supplement (https://www.springermedizin.de/resource/supplementary/12887_2012_726_MOESM1_ESM.pdf/9475590)
Supplement: MOESM1 [file 9475590]

545 children recruited at birth; questionnaires administered to parents at birth and at year 2

```
graph TD; A[545 children recruited at birth; questionnaires administered to parents at birth and at year 2] --> B[380 children assessed at 7 year follow-up (personal and family characteristics of these were not different from the characteristics of those in original cohort*). Questionnaires and airway responsiveness assessed in all subjects; cord blood and/or urinary cotinine analyzed in 365.]; B --> C[Multiple logistic regression assessed the association of ETS (by questionnaire and by cotinine) with recurrent wheeze at age 2 and with bronchial hyperresponsiveness (BHR) and asthma at age 7];
```

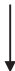

380 children assessed at 7 year follow-up (personal and family characteristics of these were not different from the characteristics of those in original cohort\*). Questionnaires and airway responsiveness assessed in all subjects; cord blood and/or urinary cotinine analyzed in 365.

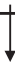

Multiple logistic regression assessed the association of ETS (by questionnaire and by cotinine) with recurrent wheeze at age 2 and with bronchial hyperresponsiveness (BHR) and asthma at age 7
